# Supplementary material for: Model of Propagation of VLF Beams in the Waveguide Earth-Ionosphere. Principles of Tensor Impedance Method in Multilayered Gyrotropic Waveguides
Source: Copernicus journal article supplement (doi:10.5194/angeo-2019-46), 2019-05-07
Supplement: Supplementary file [file angeo-2019-46-AC1-supplement.pdf]

We thank P.F. Biagi for his attention to our work and positive decision about the paper 'Model of Propagation of VLF Beams in the Waveguide Earth-Ionosphere. Principles of Tensor Impedance Method in Multilayered Gyrotropic Waveguides'. The referee had spent his time and had applied great efforts to read and evaluate our paper. We are very grateful for the approval of the TIMED method. Besides, text of the paper has been supplied by new results obtained using our model of VLF wave propagation in the waveguide 'Earth-ionosphere'.

Sincerely Yours,

On behalf of the Authors,

Yuriy Rapoport

Senior Research Fellow

Physics Faculty

National Taras Shevchenko University of Kyiv

Ukraine
